# Supplementary material for: Mapping effector genes at lupus GWAS loci using promoter Capture-C in follicular helper T cells
Source: PubMed Central journal article supplement (PMC7335045; doi:10.1038/s41467-020-17089-5), 2020-07-03
Supplement: 41467_2020_17089_MOESM1_ESM.pdf [file 41467_2020_17089_MOESM1_ESM.pdf]

## **Supplementary Information**

“Mapping effector genes at lupus GWAS loci using promoter Capture-C in follicular helper T cells,” Su et. al.

## SUPPLEMENTARY FIGURE 1

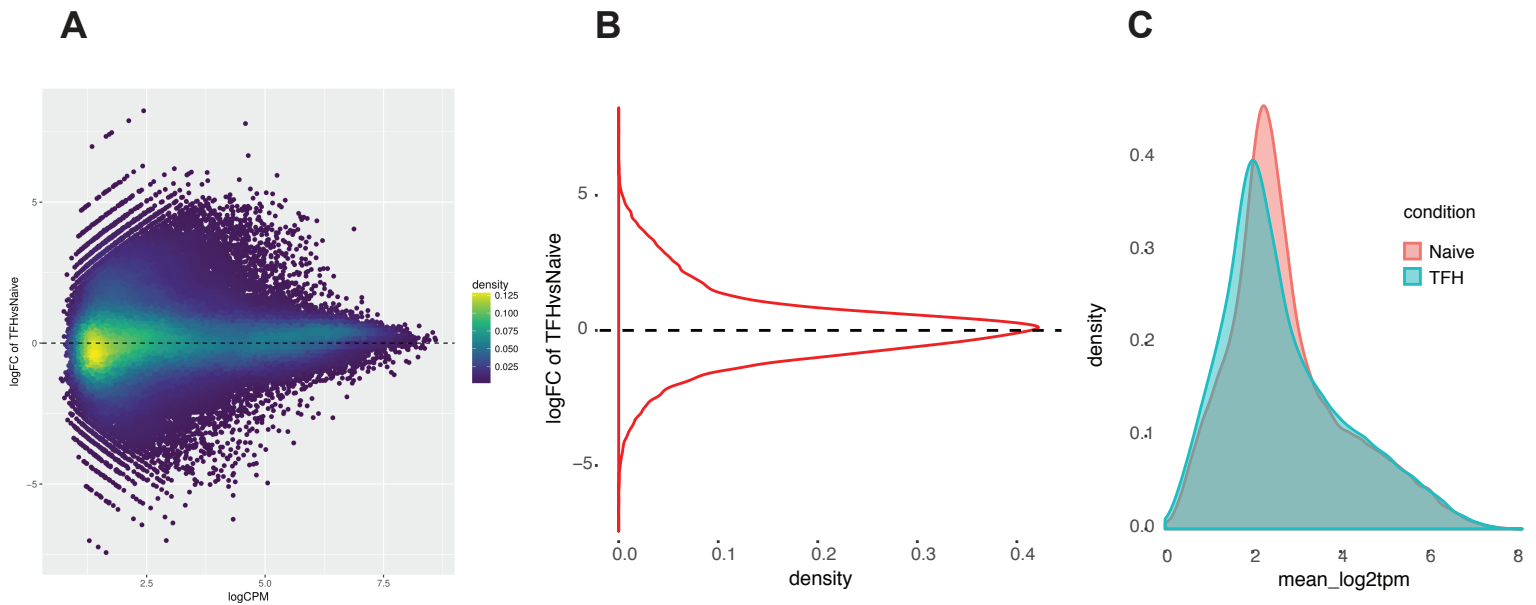

SUPPLEMENTARY FIGURE 1. TFH and naive T cells show comparable genomic accessibility. Overall  $\log_{2}$  fold changes in reference OCR accessibility (CPM) in TFH compared to naive T cells represented by density plot (a) or distribution plot (b). c. The accessibility signal was normalized by the counts per million method and mean p values across three replicates were used for comparison between TFH and naive T cells.

**SUPPLEMENTARY FIGURE 2**

**A**

MORE OPEN/EXPRESSED IN TFH

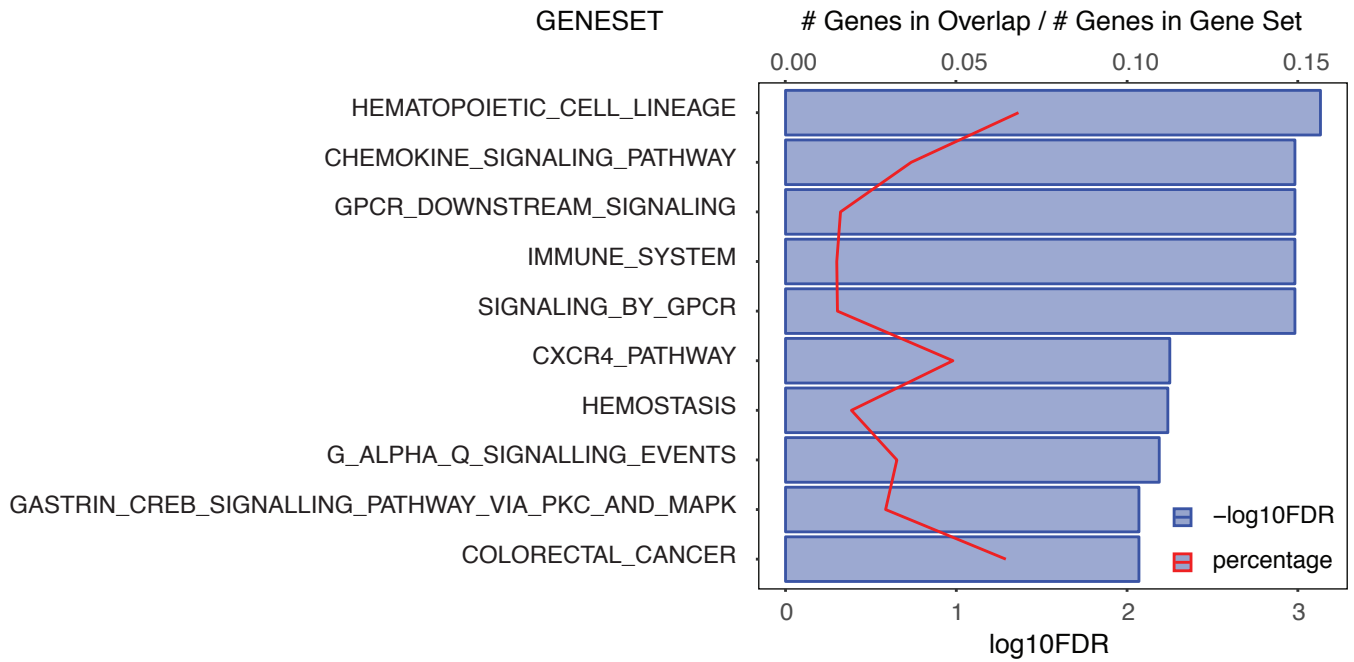

**B**

MORE OPEN/EXPRESSED IN NAIVE

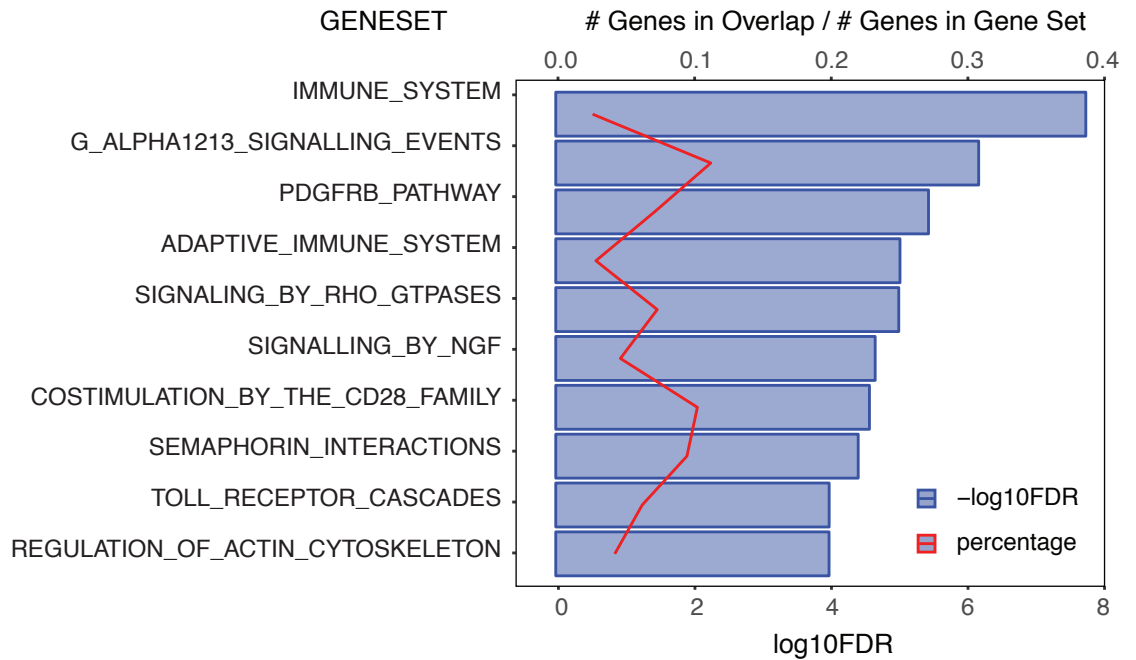

SUPPLEMENTARY FIGURE 2. Canonical pathway enrichment for genes with accessible SLE SNPs in their promoters. The  $\log_2FDR$  (blue) and gene ratios (red) for the top 10 enriched Ingenuity canonical pathways is shown for TFH (a) and naive (b) cells.

# SUPPLEMENTARY FIGURE 3 A-E

## A *IL21*

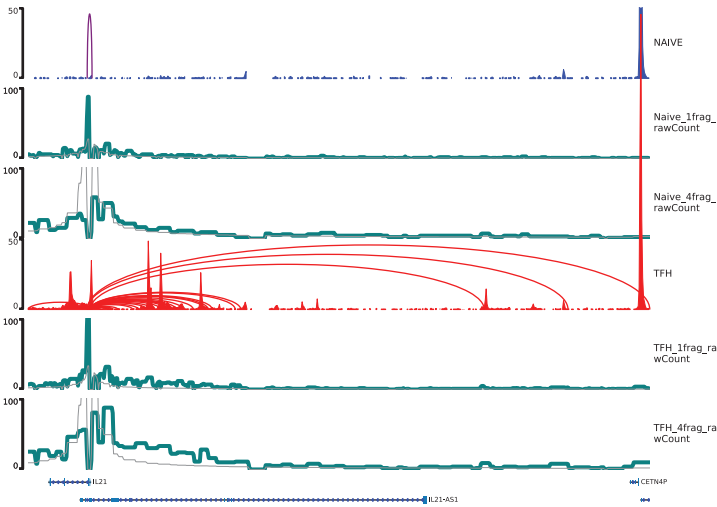

## B *IFNG*

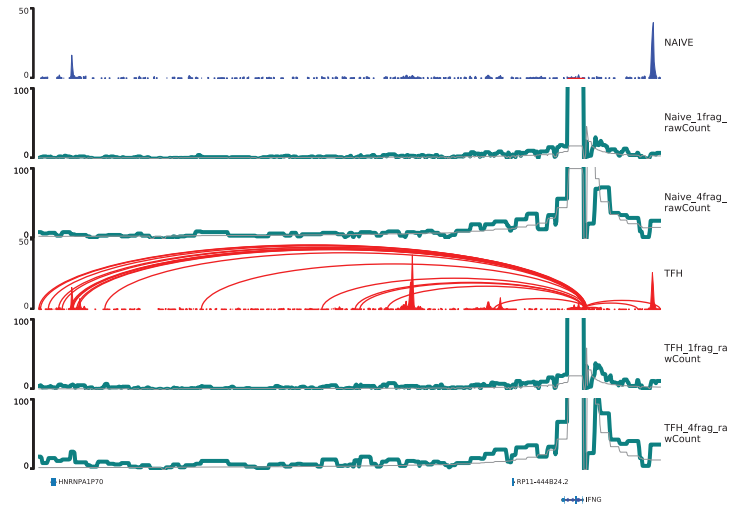

## C *CD28*

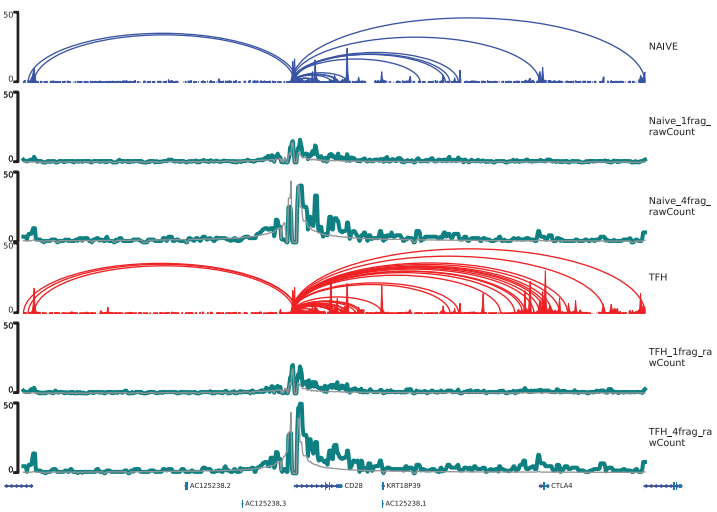

## D *CTLA4*

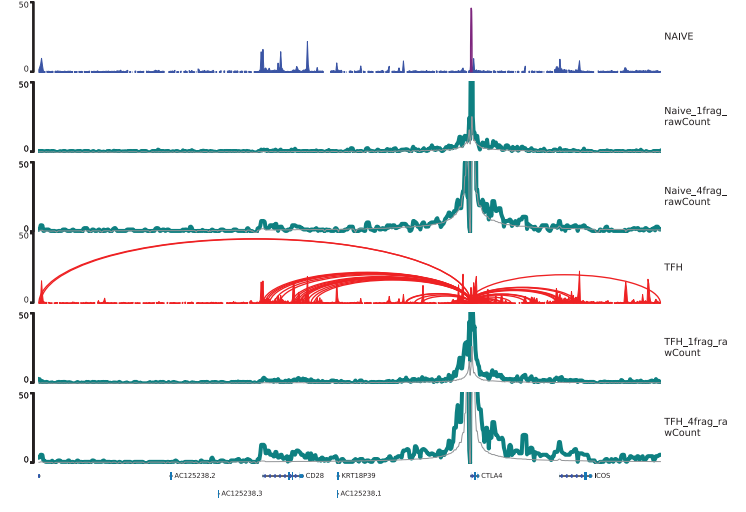

## E *ICOS*

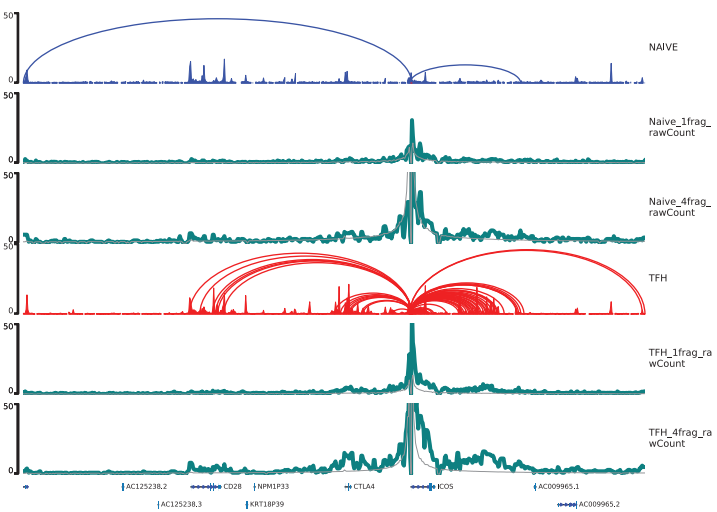

# SUPPLEMENTARY FIGURE 3 F-N

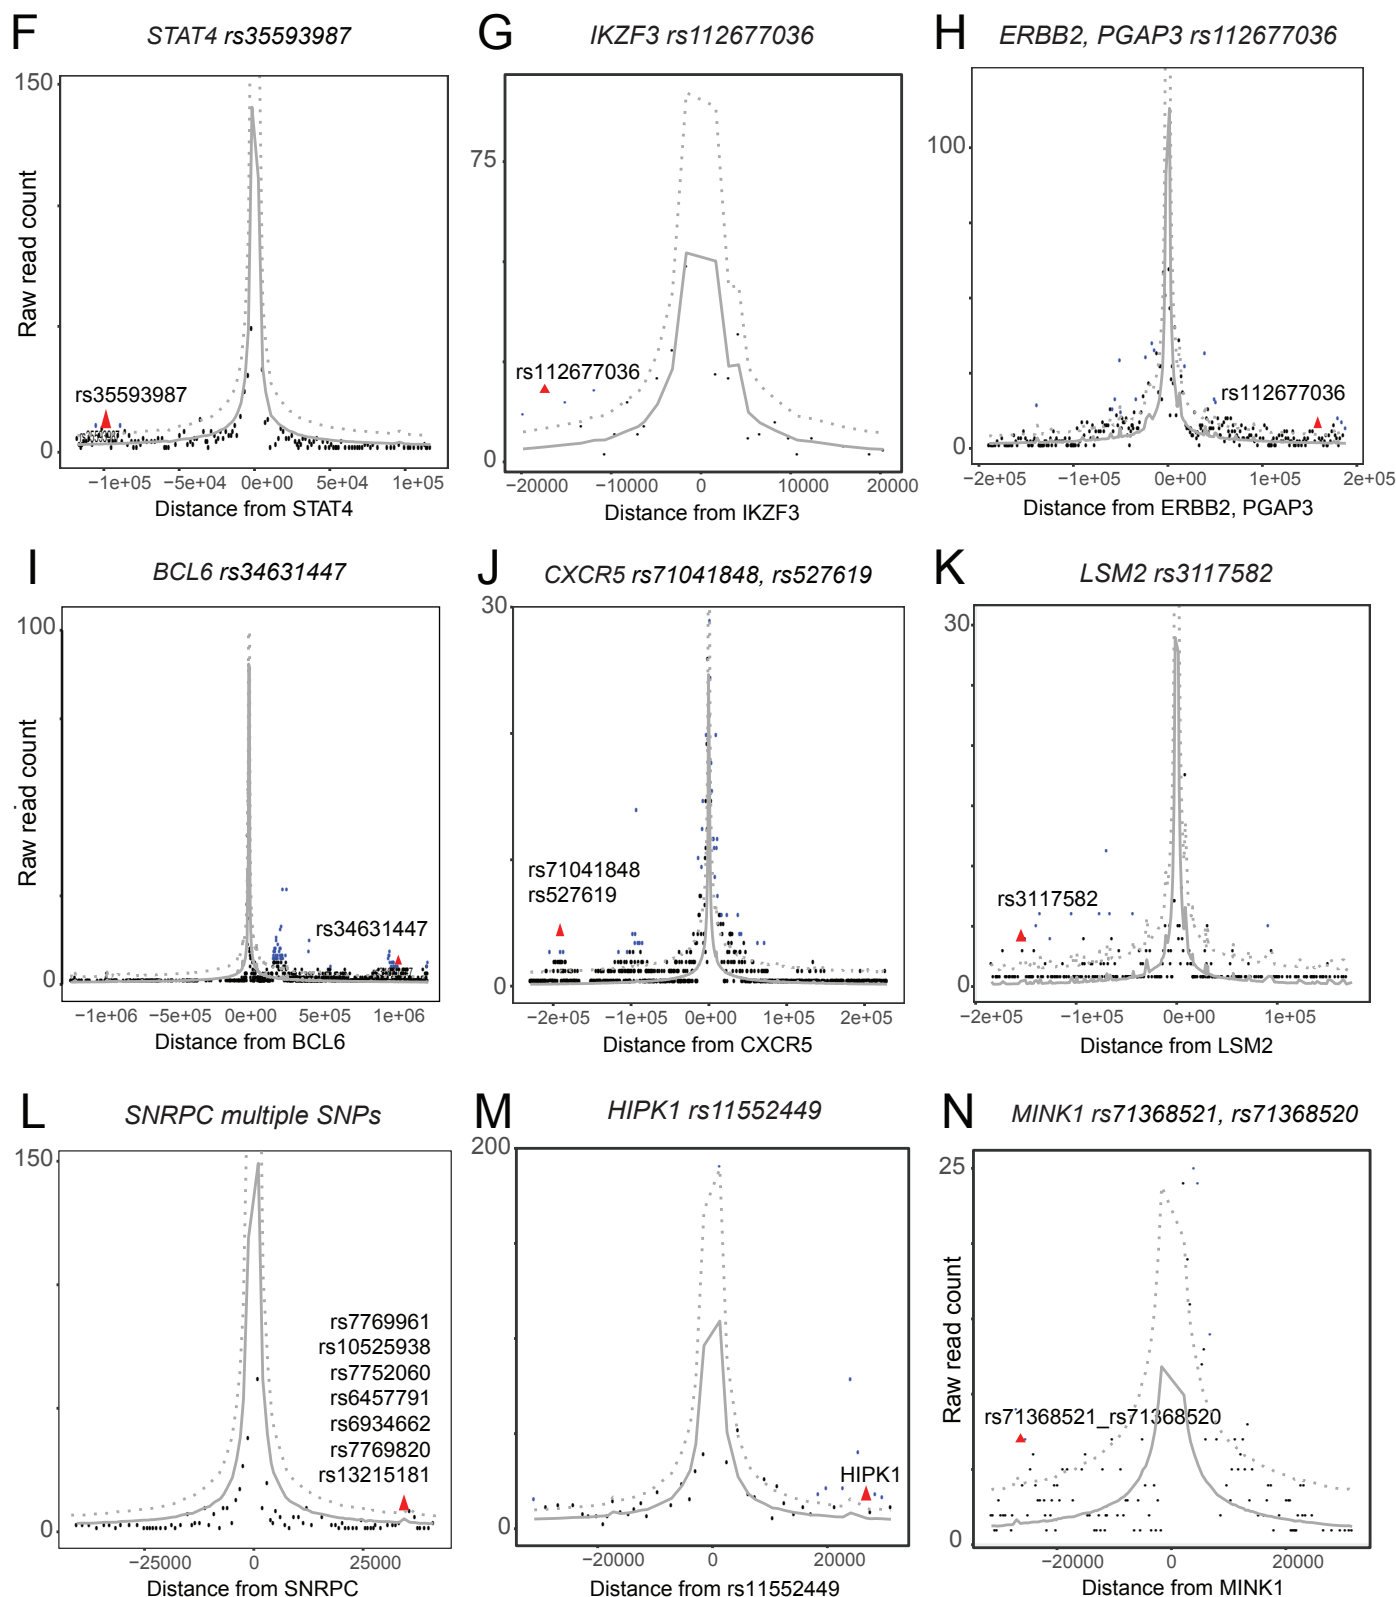

SUPPLEMENTARY FIGURE 3. Raw paired read count data supporting significant CHiCAGO promoter interaction calls. A-E. Fragment interactions with gene promoter baits of IL21 (A), IFNG (B), CD28 (C), CTLA4 (D) and ICOS (E) in naïve and TFH. The arc tracks represent the significant interaction (Chicago score > 5) between promoter bait and promoter interacting regions (PIRs). The interactions from 1frag and 4frag resolution were merged while only the higher 1frag resolution was used if interactions were called in both resolutions. The raw read pair count (green line) and the expected level of Brownian collision background (grey line) were plotted per bait at both 1frag and 4frag resolution. F-N. Raw paired read count data supporting significant CHiCAGO promoter-SNP interaction calls for STAT4 (F), IKZF3 (G), ERBB2 (H), BCL6 (I), CXCR5 (J), LSM2 (K), SNRPC(L), HIPK1 (M) and MINK1 (N) in TFH. Centered at promoter bait, the raw read pair count for each PIR was plotted as a dot within the distance between bait and SNP-containing PIR at the resolution of this interaction detected. The points representing significant interactions (Chicago score > 5) is colored blue and red triangle indicates the significant interaction between bait and SNP(s)-containing PIR. The expected level of Brownian collision background (solid line) and upper limit of 95% confidence of Brownian background (dashed line) were plotted per bait at corresponding resolution.

# SUPPLEMENTARY FIGURE 4

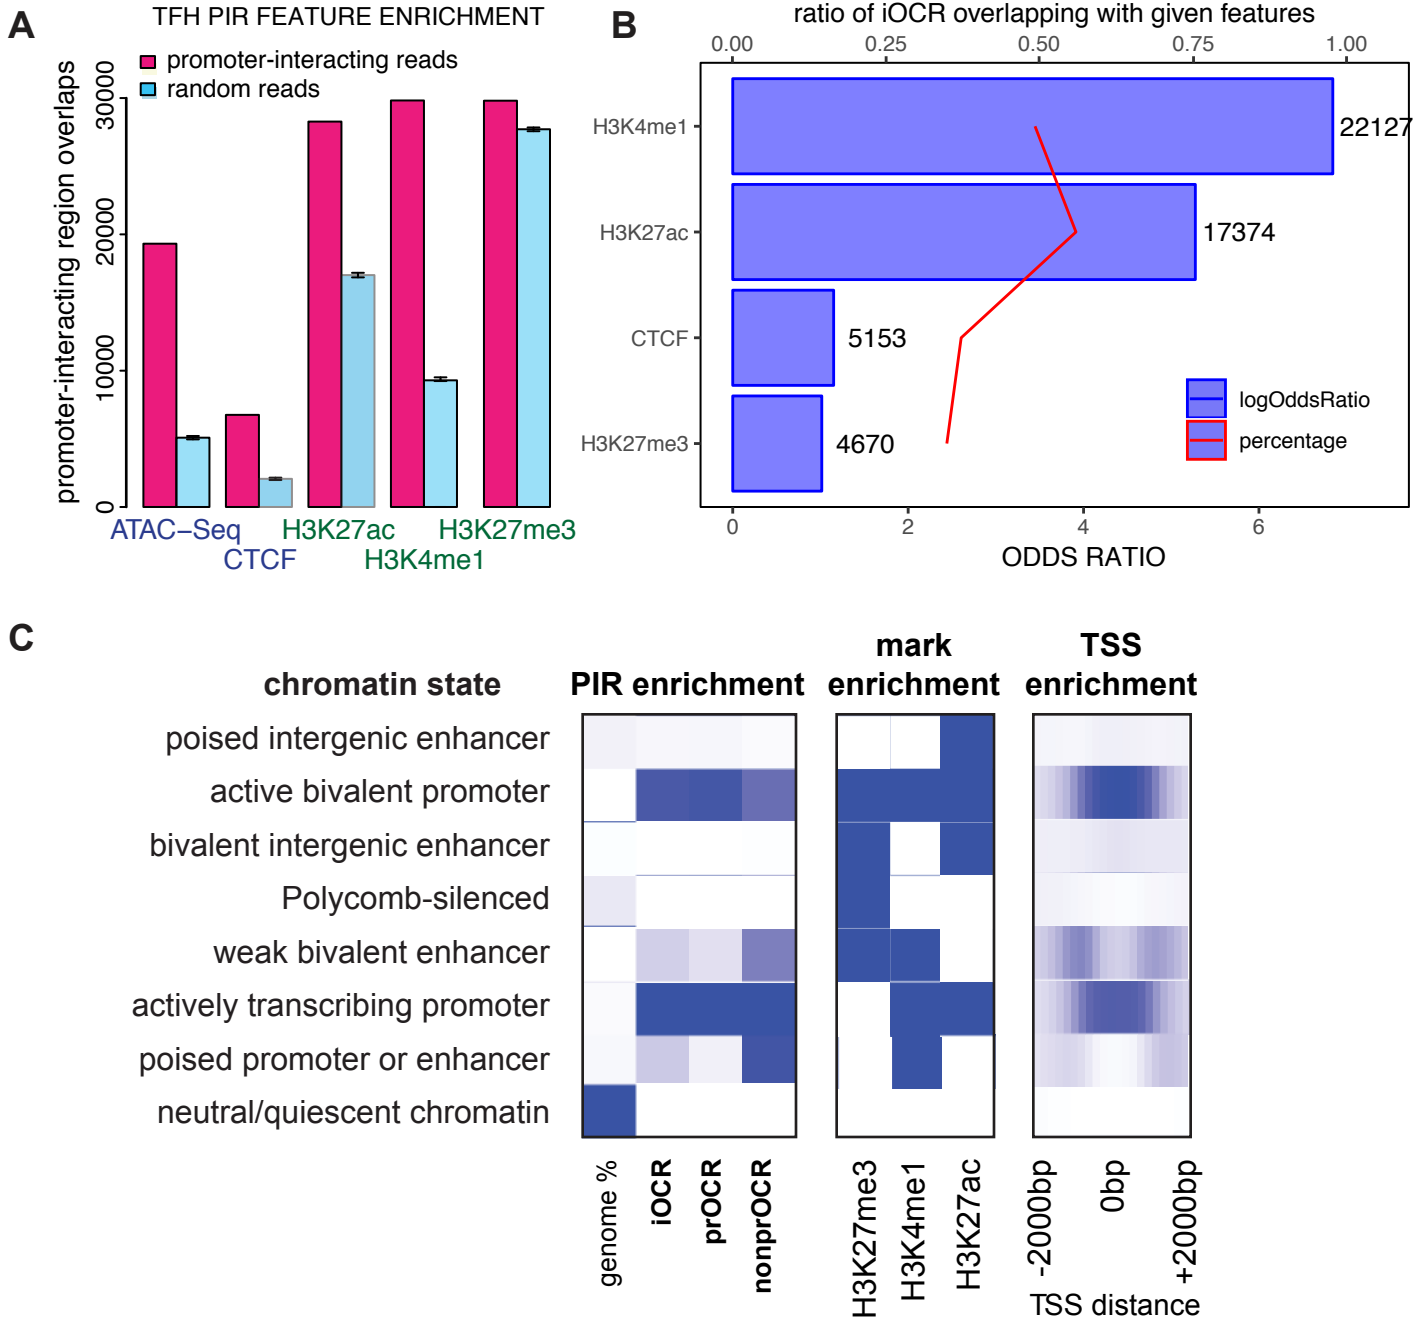

SUPPLEMENTARY FIGURE 4. Enrichment of chromatin signatures at promoter interacting regions in TFH cells. a. PIR enrichment for genomic features compared with distance-matched random regions in TFH cells. Error bars show 95% CI across 100 draws of non-significant interactions. b. Feature enrichment of promoter-interacting OCR (iOCR) compared to a random sample of non-promoter-interacting OCR in TFH. c. Enrichment of iOCR within chromHMM-defined chromatin states and TSS neighborhood in TFH. Roadmap Epigenomics 8-state models (middle panel) were defined on the basis of 3 histone modifications (H3K4me1, H3K4me3, H3K27me3, H3K27ac and H3K36me3). Blue color intensity represents the probability of observing the mark in the state. The heatmap to the left of the emission parameters displays the overlap fold enrichment for different categories of iOCR, while the heatmap to the right shows the fold enrichment for each state within 2 kb around a set of TSS. Blue color intensity represents fold enrichment.

## SUPPLEMENTARY FIGURE 5

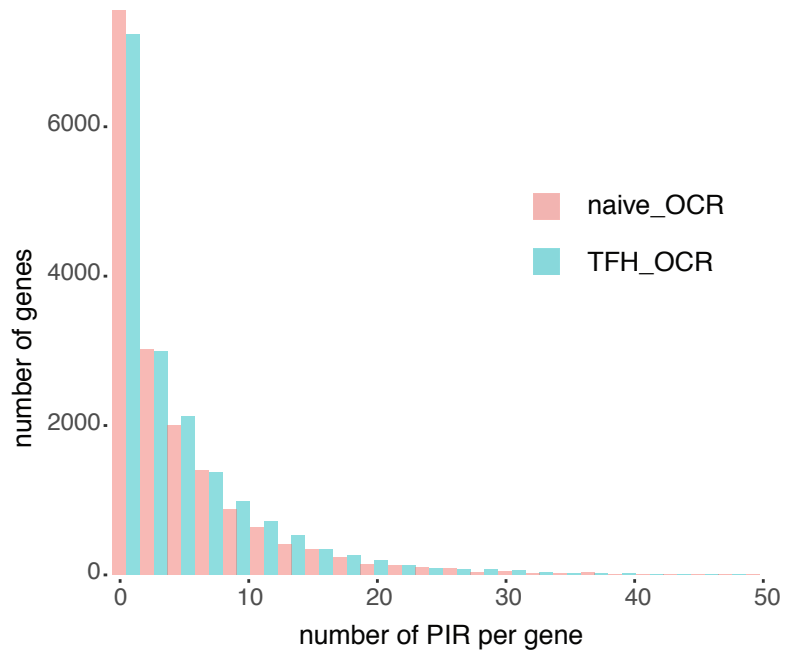

SUPPLEMENTARY FIGURE 5. Distribution of promoter-interacting OCR per gene in naïve T and TFH cells. The number of promoter-interacting OCR per gene is plotted for both naïve T (red) and TFH (blue) cells.

# SUPPLEMENTARY FIGURE 6

## A Naive

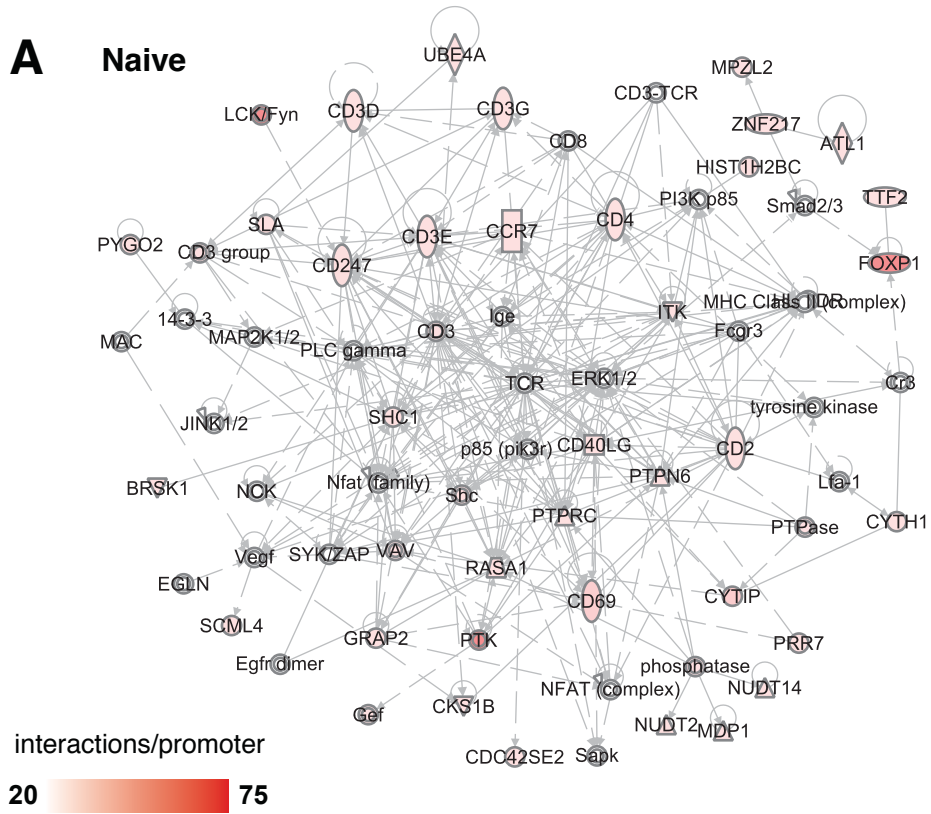

## B TFH

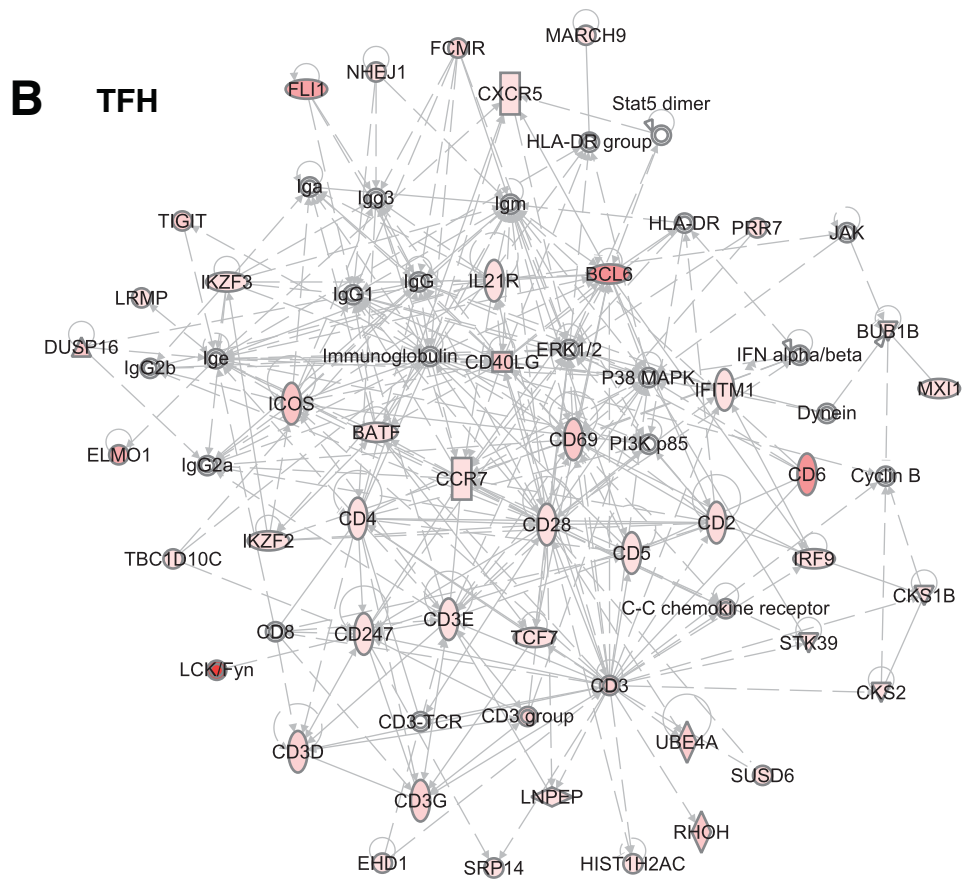

SUPPLEMENTARY FIGURE 6. Immune networks enriched among SLE SNP connectome implicated gene sets. The top 3 merged immune networks in naïve (a) and TFH (b) are depicted. Red color intensity represents the number of interactions detected per promoter for each gene in the network.



## SUPPLEMENTARY FIGURE 7

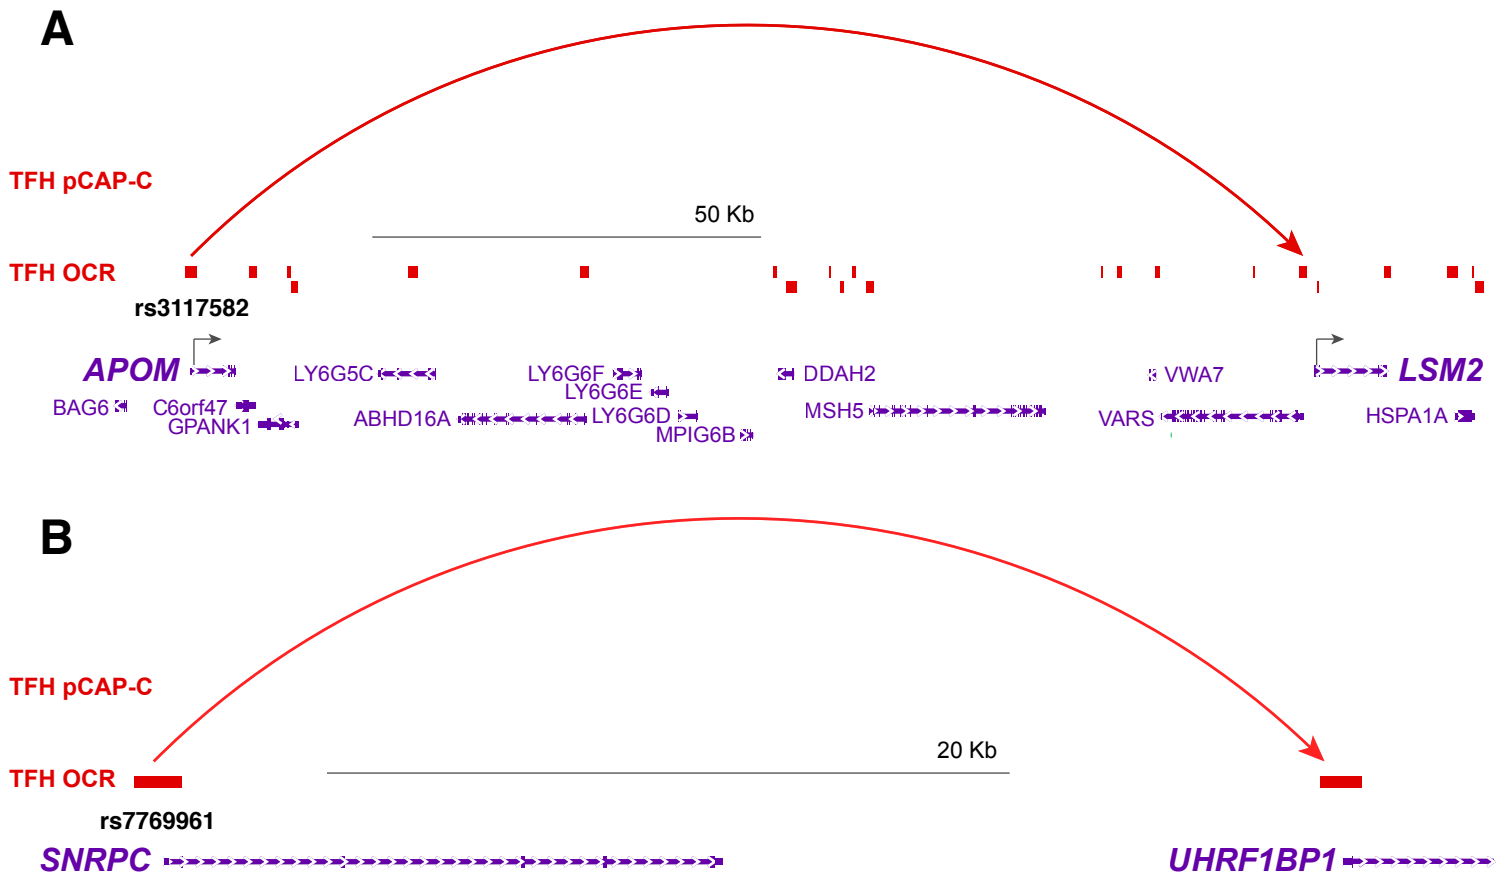

SUPPLEMENTARY FIGURE 7. Interaction of open SLE variants with genes encoding nuclear proteins targeted by autoantibodies in SLE patients. a. The accessible SNP rs3117582 at the promoter of *APOM* physically interacts with the *LSM2* promoter. b. The accessible SNP rs7769961 at the *SNRPC* promoter physically interacts with the *UHRF1BP1* promoter.

## SUPPLEMENTARY FIGURE 8

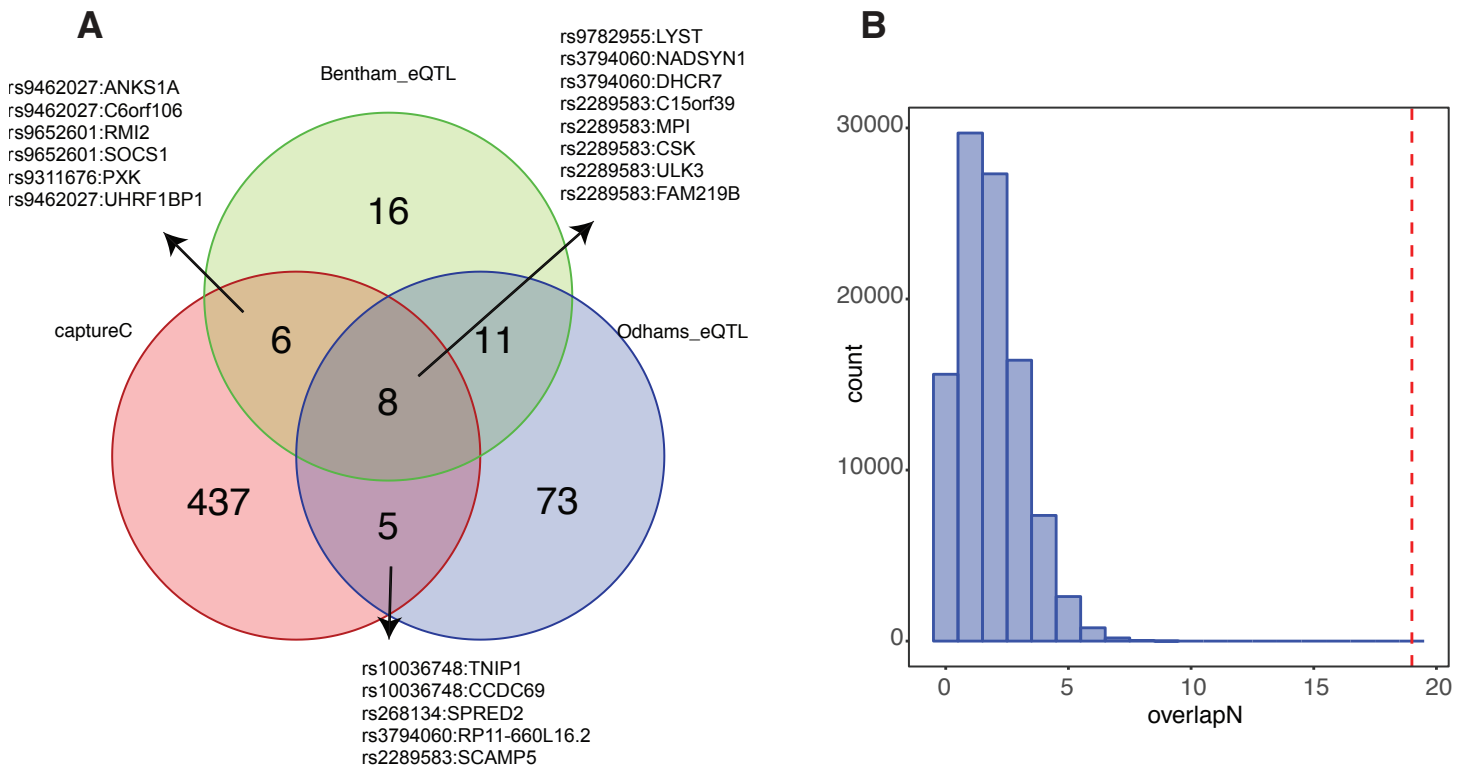

SUPPLEMENTARY FIGURE 8. Comparison of SLE SNP-gene associations obtained by promoter-open chromatin connectomes vs. eQTL studies. a. Comparison of sentinel SNP-gene pairs implicated by the promoter-open chromatin connectomes in this study vs. sentinel SNP-gene pairs statistically associated in two SLE eQTL studies<sup>7,29</sup>. SNP-gene pairs shared by each group are detailed. b. An empirical distribution hypothesis testing approach (see methods) was used to compare the observed overlap between SLE variant-connected genes and SLE eQTL genes (19) and the overlap expected at random (1).

# SUPPLEMENTARY FIGURE 9

**A**

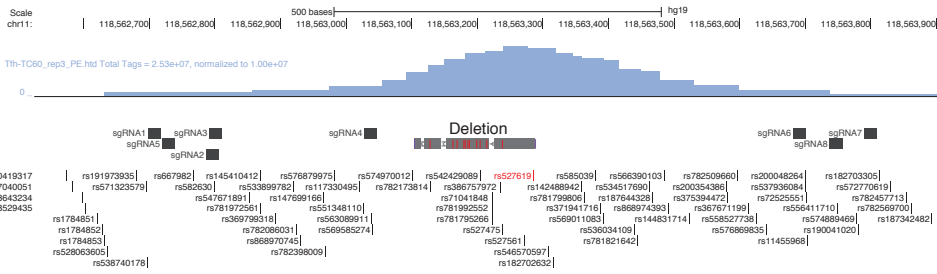

**B**

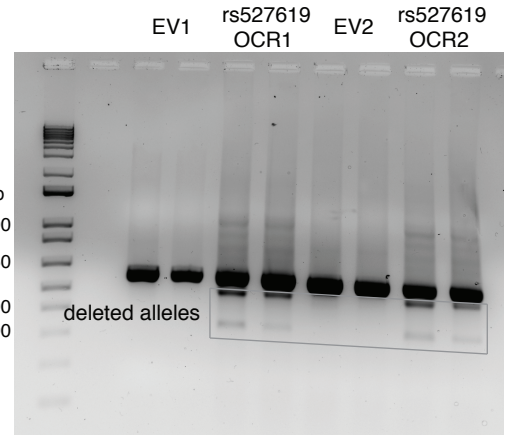

**C**

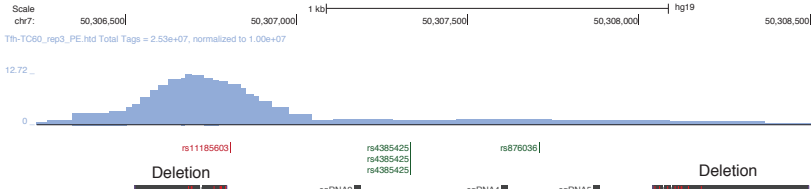

**D**

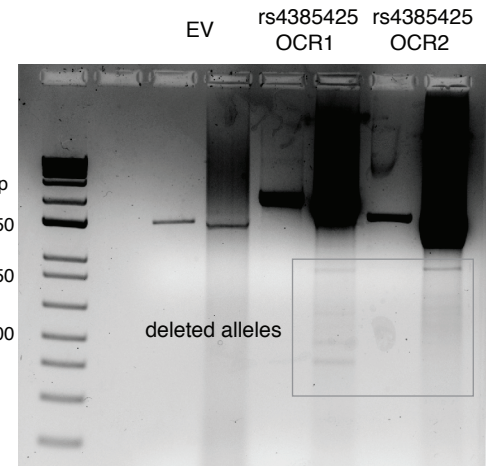

**E**

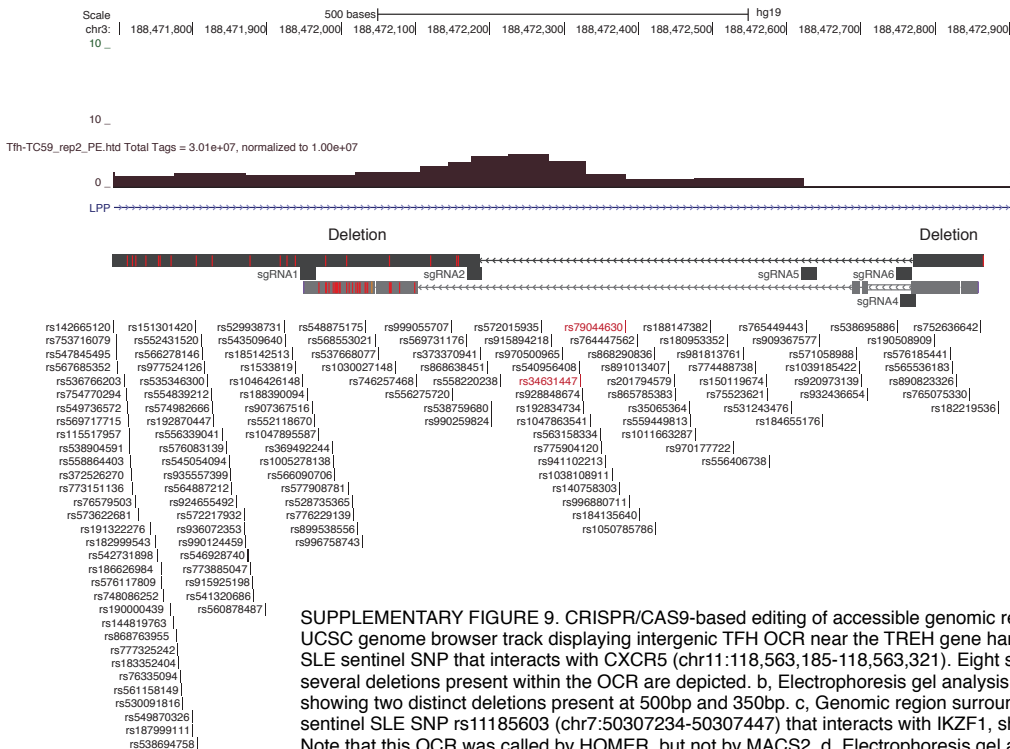

**F**

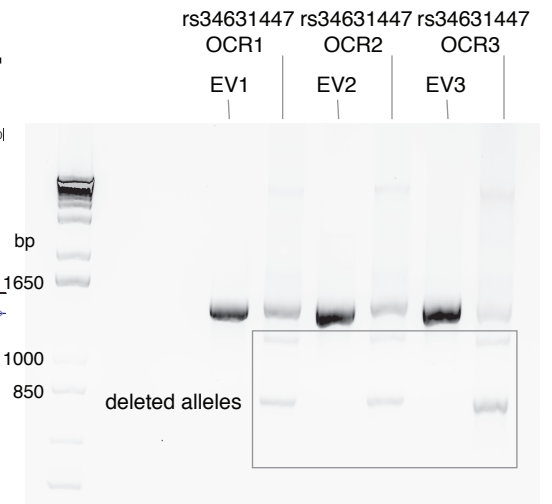

SUPPLEMENTARY FIGURE 9. CRISPR/CAS9-based editing of accessible genomic regions containing SLE GWAS proxy SNP in Jurkat T cells. a, UCSC genome browser track displaying intergenic TFH OCR near the TREH gene harboring the rs527619 and rs71041848 proxies to the rs4639966 SLE sentinel SNP that interacts with CXCR5 (chr11:118,563,185-118,563,321). Eight sgRNAs flanking the OCR and Sanger sequencing identifying several deletions present within the OCR are depicted. b, Electrophoresis gel analysis of PCR amplified regions encompassing the targeted region showing two distinct deletions present at 500bp and 350bp. c, Genomic region surrounding the TFH OCR containing the rs4385425 SNP proxy to the sentinel SLE SNP rs11185603 (chr7:50307234-50307447) that interacts with IKZF1, showing sgRNAs and deletions detected in targeted Jurkat lines. Note that this OCR was called by HOMER, but not by MACS2. d, Electrophoresis gel analysis detects three different deletions at 900bp, 400bp and 350bp. e, Intronic OCR (chr3:188,472,234-188,472,390) in the LPP locus harboring the rs34631447 and rs79044630 SNPs proxy to sentinel rs6762714 SLE SNP and found connected to BCL6. This region was targeted with five total sgRNAs surrounding the OCR and Sanger sequencing showed two distinct deletions. f, Electrophoresis gel analysis detects 1200bp and 821bp deletions. All experiments were performed in three biological replicates.

# SUPPLEMENTARY FIGURE 10

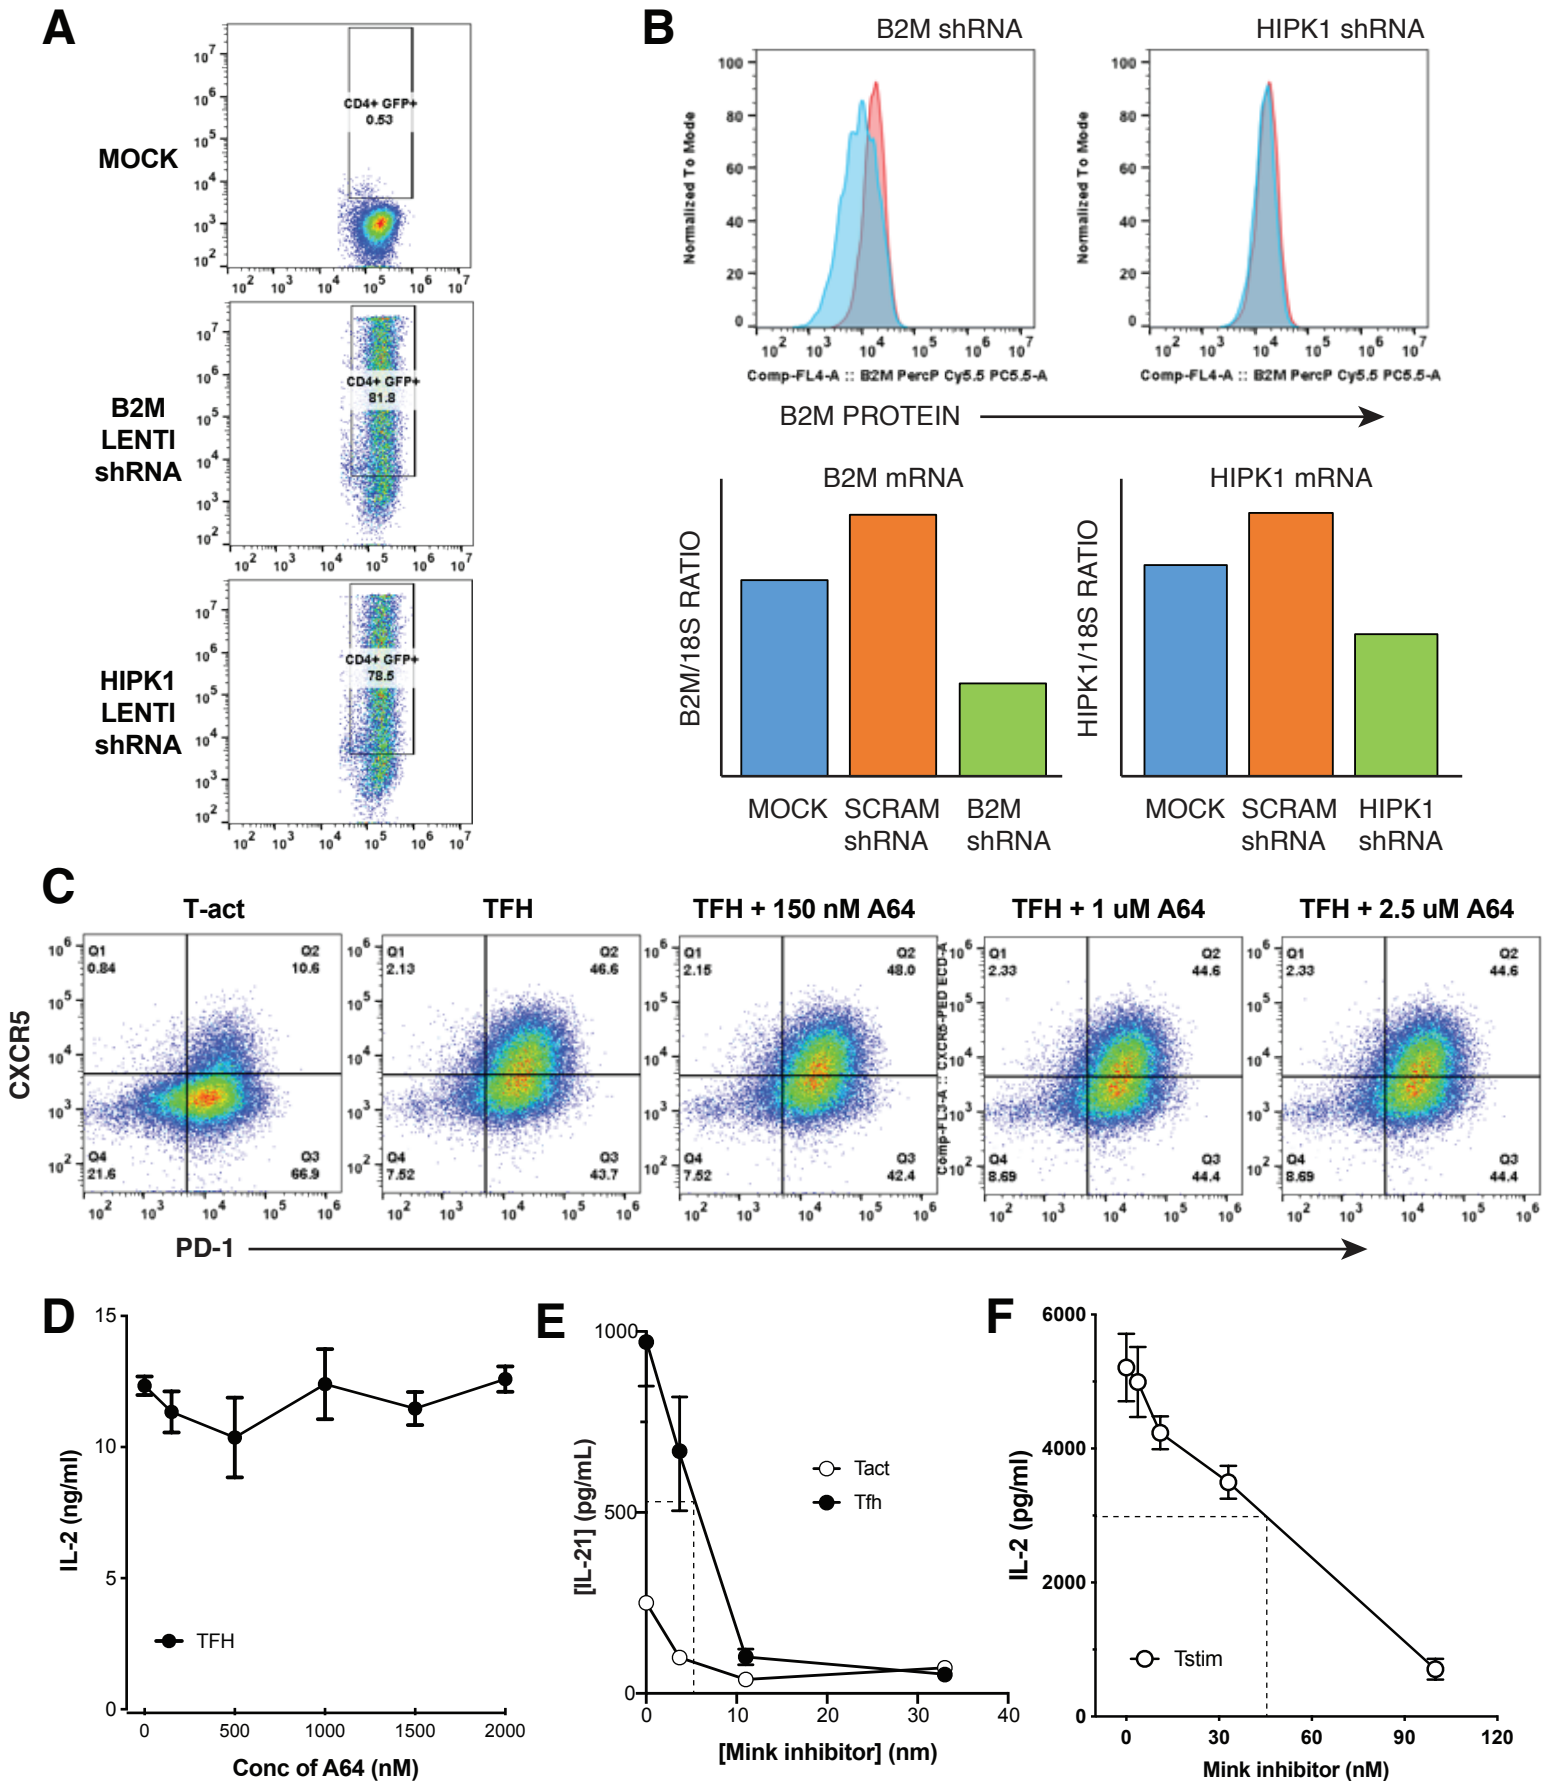

SUPPLEMENTARY FIGURE 10. Promoter-variant connectome-guided targeting of novel kinases for modulation of primary human TFH function. a, Lentiviral delivery of B2M shRNA and HIPK1 shRNA into in vitro differentiated TFH as assessed by GFP fluorescence by flow cytometry. b, Assessment of shRNA-mediated knock-down of B2M and HIPK1 in TFH by flow cytometry and qRT-PCR. Red histograms are TFH transduced with scrambled control shRNA, and blue histograms depict TFH transduced with specific B2M (left panel) or HIPK1 (right panel) shRNA. c, Effect of HIPK inhibitory drug treatment on TFH differentiation in vitro as measured by co-induction of PD-1 and CXCR5. d, The HIPK inhibitory drug A64 does not affect IL-2 secretion by TFH cells as measured by ELISA. e, A MINK inhibitory drug causes dose-dependent inhibition of IL-21 production by Tact and Tfh cells with an ED50 of ~5.0 nM. f, A MINK inhibitory drug inhibits IL-2 secretion by activated T cells with an ED50 of ~50 nM. Data in d-f are mean  $\pm$  s.d. All data are representative of 3 replicate experiments.

# SUPPLEMENTARY FIGURE 11

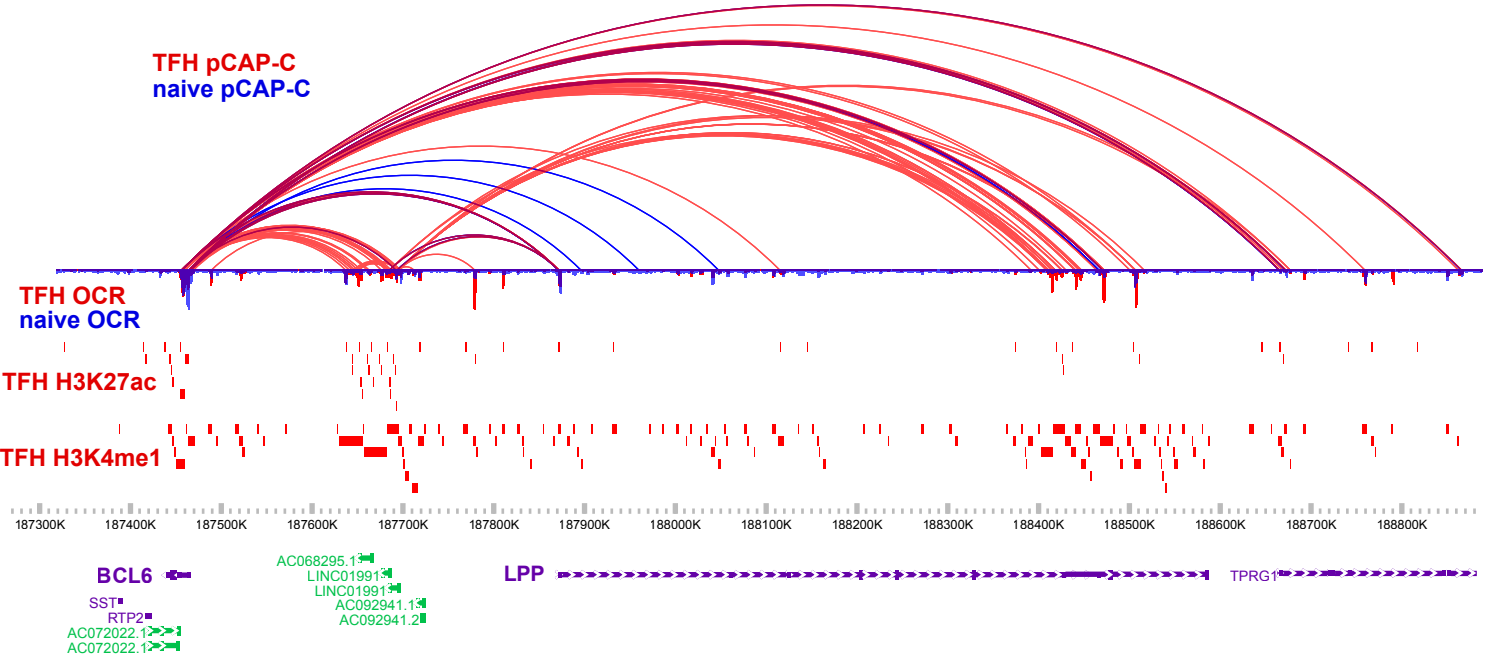

SUPPLEMENTARY FIGURE 11. 3D epigenomic map of promoter-Capture-C, ATAC-seq, H3K27ac, and H3K4me1 in the BCL6-LPP region in naive (blue) and TFH cells (red).

SUPPLEMENTARY FIGURE 12

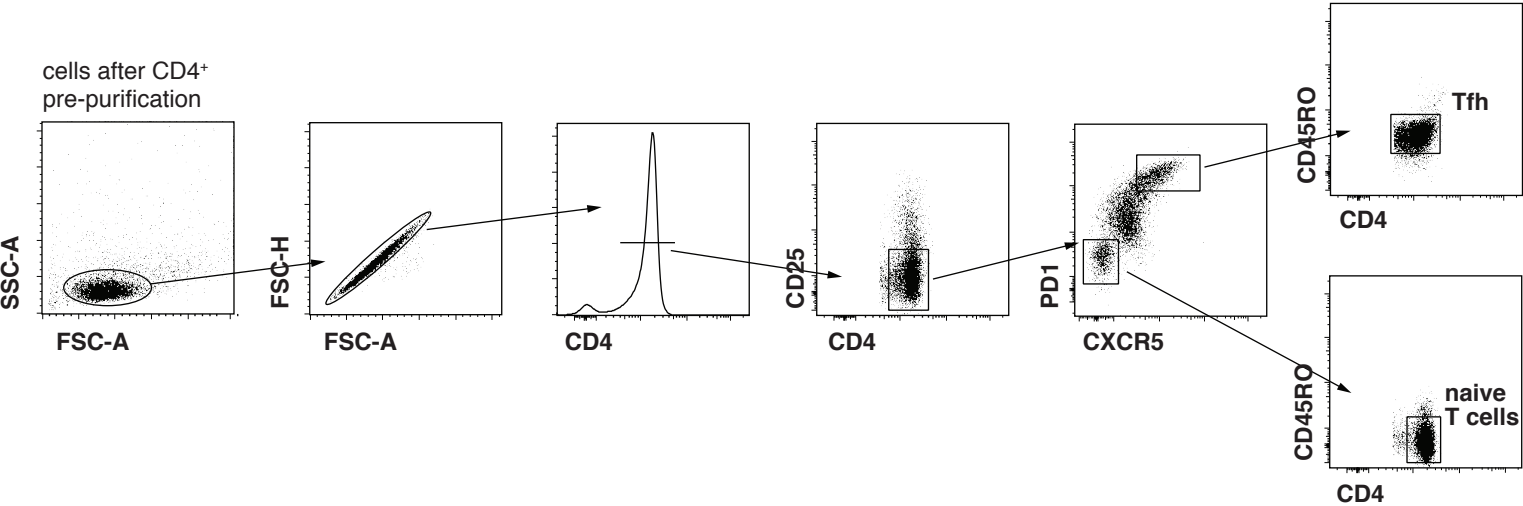

SUPPLEMENTARY FIGURE 12. Gating strategy for sorting of tonsillar naive CD4+ T cells and follicular helper T cells used for generation of promoter Capture-C, ATAC-seq, and transcriptomic data. Cell preparation and staining details are listed in the Methods section.

Supplementary Table 1. LDSC analysis.

| disease_atacSet | Prop_SNPs   | Prop_h2     | Prop_h2_std | Enrichment  | Enrichment_std | Enrichment_p |
|-----------------|-------------|-------------|-------------|-------------|----------------|--------------|
| SLE_TFH_atac    | 0.017535355 | 0.271554626 | 0.095119975 | 15.48612082 | 5.424468145    | 0.003505724  |
| SLE_naive_atac  | 0.017643512 | 0.247419471 | 0.102033394 | 14.02325559 | 5.783054788    | 0.011160528  |
| SLE_TFH_iOCR    | 0.007115549 | 0.144754605 | 0.071080947 | 20.34341972 | 9.989523552    | 0.013687843  |
| SLE_naive_iOCR  | 0.006899405 | 0.106275957 | 0.066712335 | 15.40364091 | 9.669288139    | 0.066323836  |

Supplementary Table 2. CHiCAGO summary.

|                                                                              | Naïve          |                |                | TFH            |                |                |
|------------------------------------------------------------------------------|----------------|----------------|----------------|----------------|----------------|----------------|
|                                                                              | 1frag          | 4frag          | merge          | 1frag          | 4frag          | merge          |
| Number of bait fragments with interactions                                   | 26366 (71.86%) | 26861 (78.19%) | 48767 (68.64%) | 25401 (69.23%) | 25846 (75.23%) | 46666 (65.69%) |
| Number of interactions                                                       | 143323         | 195464         | 255238         | 118410         | 177653         | 224263         |
| Number of trans interactions                                                 | 791 (0.55%)    | 766 (0.39%)    | 1026 (0.40%)   | 1480 (1.25%)   | 883 (0.50%)    | 1747 (0.78%)   |
| Number bait-to-bait interactions                                             | 19290 (13.46%) | 41715 (21.34%) | 48995 (19.20%) | 17784 (15.02%) | 41180 (23.18%) | 47299 (21.09%) |
| Median bait-OE distance for cis interactions (including bait-to-bait)        | 22,735         | 93,332.50      | 57,263.00      | 18,544         | 87,034.50      | 54,270.50      |
| Median number of interactions per bait fragment (including bait-to-bait)     | 2              | 3              | 3              | 2              | 3              | 3              |
| Median number of cis-interactions per bait fragment (including bait-to-bait) | 2              | 3              | 3              | 2              | 3              | 3              |
| Number of unique non-bait OE                                                 | 101603         | 96638          |                | 83295          | 86393          |                |
| Median number of interacting bait fragments per non-bait OE                  | 1              | 1              |                | 1              | 1              |                |
| Number of non-bait OE interacting with a single bait fragment                | 85790 (84.44%) | 65711 (68.00%) |                | 70825 (85.03%) | 59167 (68.49%) |                |
| Number of non-bait OE interacting with >=4 bait fragments                    | 1426 (1.40%)   | 6201 (6.42%)   |                | 1024 (1.23%)   | 5398 (6.25%)   |                |



Supplementary Table 3. Interaction summary.

|                    |                                                      | TFH     | naïve   | Ref     |
|--------------------|------------------------------------------------------|---------|---------|---------|
| iOCR number        |                                                      | 25,813  | 24,470  | 31,404  |
|                    | promoter-proximal region                             | 14,617  | 14,275  | 16,295  |
|                    | promoter distal region                               | 11,196  | 10,195  | 15,109  |
| Interaction number |                                                      | 52,958  | 48,496  | 71,137  |
|                    | promoter-proximal region to promoter-proximal region | 21,484  | 19,332  | 30,815  |
|                    | promoter-proximal region to promoter-distal region   | 31,474  | 29,164  | 40,322  |
| median distance    |                                                      | 105,074 | 110,632 | 117,496 |
|                    | promoter-proximal region to promoter-proximal region | 104,022 | 110,620 | 112,492 |
|                    | promoter-proximal region to promoter-distal region   | 106,484 | 110,660 | 122,972 |
| Transcript number  |                                                      | 74,504  | 73,796  | 79,330  |
|                    | promoter-proximal region to promoter-proximal region | 73,460  | 72,472  | 78,357  |
|                    | promoter-proximal region to promoter-distal region   | 32,336  | 31,528  | 39,404  |
| Gene number        |                                                      | 17,324  | 17,143  | 18,669  |
|                    | promoter-proximal region to promoter-proximal region | 16,973  | 16,744  | 18,310  |
|                    | promoter-proximal region to promoter-distal region   | 7,995   | 7,746   | 9,724   |
